# Supplementary material for: Exploring plasma biomarkers for therapeutic response to tyrosine kinase inhibitors in advanced hepatocellular carcinoma: Interleukin-8 as a key prognostic indicator
Source: Research Square preprint supplement (doi:10.21203/rs.3.rs-8323662/v1), 2025-12-16
Supplement: Supplementary file 1 [file fe07e5e20fda1d0b7347aef9.pdf]

**Table S1.** Baseline characteristics of 60 patients with advanced hepatocellularcarcinoma (HC C) who received sorafenib or lenvatinib treatment in the AJOU-HCC cohort.

| Characteristics                             | All Patients (n=60)  |
|---------------------------------------------|----------------------|
| Age [years, median (range)]                 | 59 (37-80)           |
| Male sex [n (%)]                            | 58 (95.1)            |
| Treatment modality [n (%)]                  |                      |
| Sorafenib                                   | 39 (63.9)            |
| Lenvatinib                                  | 21 (34.4)            |
| Platelet ( $\times 10^9/L$ , mean $\pm$ SD) | 185.3 $\pm$ 93.2     |
| Albumin (g/L, mean $\pm$ SD)                | 4.0 $\pm$ 0.5        |
| Bilirubin (mg/dL, mean $\pm$ SD)            | 1.1 $\pm$ 1.0        |
| Creatinine (mg/dL, mean $\pm$ SD)           | 1.1 $\pm$ 1.5        |
| AFP (ng/L, mean $\pm$ SD)                   | 6322.7 $\pm$ 15569.5 |
| ALT (U/L, mean $\pm$ SD)                    | 58.3 $\pm$ 74.7      |
| AST (U/L, mean $\pm$ SD)                    | 118.1 $\pm$ 250.5    |
| INR (mean $\pm$ SD)                         | 1.2 $\pm$ 0.5        |
| Underlying liver disease [n (%)]            |                      |
| CHB                                         | 41 (68.3)            |
| CHC                                         | 4 (6.7)              |
| Alcoholic                                   | 10 (16.7)            |
| Unknown                                     | 5 (8.3)              |
| Follow-up period [months median (range)]    | 9 (1–40)             |
| ECOG performance status [n (%)]             |                      |
| 0                                           | 20 (37.0)            |
| 1                                           | 34 (63.0)            |
| Tumor size (cm, mean $\pm$ SD)              | 11.1 $\pm$ 4.7       |
| Modified UICC stage [n (%)]                 |                      |
| II                                          | 1 (1.7)              |
| III                                         | 10 (16.7)            |
| IVa                                         | 32 (53.3)            |
| IVb                                         | 17 (28.3)            |

Responder classification [n (%)]

|    |           |
|----|-----------|
| CR | 0 (0.0)   |
| PR | 7 (11.7)  |
| SD | 29 (48.3) |
| PD | 24 (40.0) |

---

AFP, alpha-fetoprotein; ALT, alanine aminotransferase; AST, aspartate aminotransferase; INR, international normalized ratio; CHB, chronic hepatitis B; CHC, chronic hepatitis C; ECOG, European Cooperative Oncology Group; UICC, Union for International Cancer Control, CR; Complete response, PR; Partial response, SD; Stable disease, PD; Progressive disease

**Table S2.** List of abbreviations defined for this manuscript

| Abbreviation | Full Term                                       |
|--------------|-------------------------------------------------|
| ANGPT2       | Angiopoietin 2                                  |
| AUROC        | Area under the ROC curve                        |
| CSF-1        | Colony-stimulating factor 1                     |
| CR           | Complete response                               |
| CI           | Confidence intervals                            |
| CXCL12       | C-X-C motif chemokine ligand 12                 |
| DB           | Database                                        |
| DC           | Disease control                                 |
| DEPs         | Differentially expressed proteins               |
| DP           | Disease progression                             |
| EMT          | Epithelial-mesenchymal transition               |
| GSEA         | Gene set enrichment analysis                    |
| HR           | Hazard ratio                                    |
| HCC          | Hepatocellular carcinoma                        |
| ICI          | Immune checkpoint inhibitor                     |
| IL-13        | Interleukin 13                                  |
| MMP12        | Matrix metalloproteinase 12                     |
| mUICC        | Modified Union for International Cancer Control |
| NT           | Normal tissue                                   |
| NF           | Nuclear factor                                  |
| OS           | Overall survival                                |
| PR           | Partial response                                |
| PVTT         | Portal vein tumor thrombus                      |
| PT           | Primary tumor                                   |
| PFS          | Progression-free survival                       |
| PD           | Progressive disease                             |
| ROC          | Receiver operating characteristic               |
| scRNA-seq    | Single-cell RNA sequencing                      |
| SD           | Stable disease                                  |
| TME          | Tumor microenvironment                          |
| TNF          | Tumor necrosis factor                           |
| TKIs         | Tyrosine kinase inhibitors                      |
| UMAP         | Uniform manifold approximation and projection   |
| VEGFA        | Vascular endothelial growth factor A            |

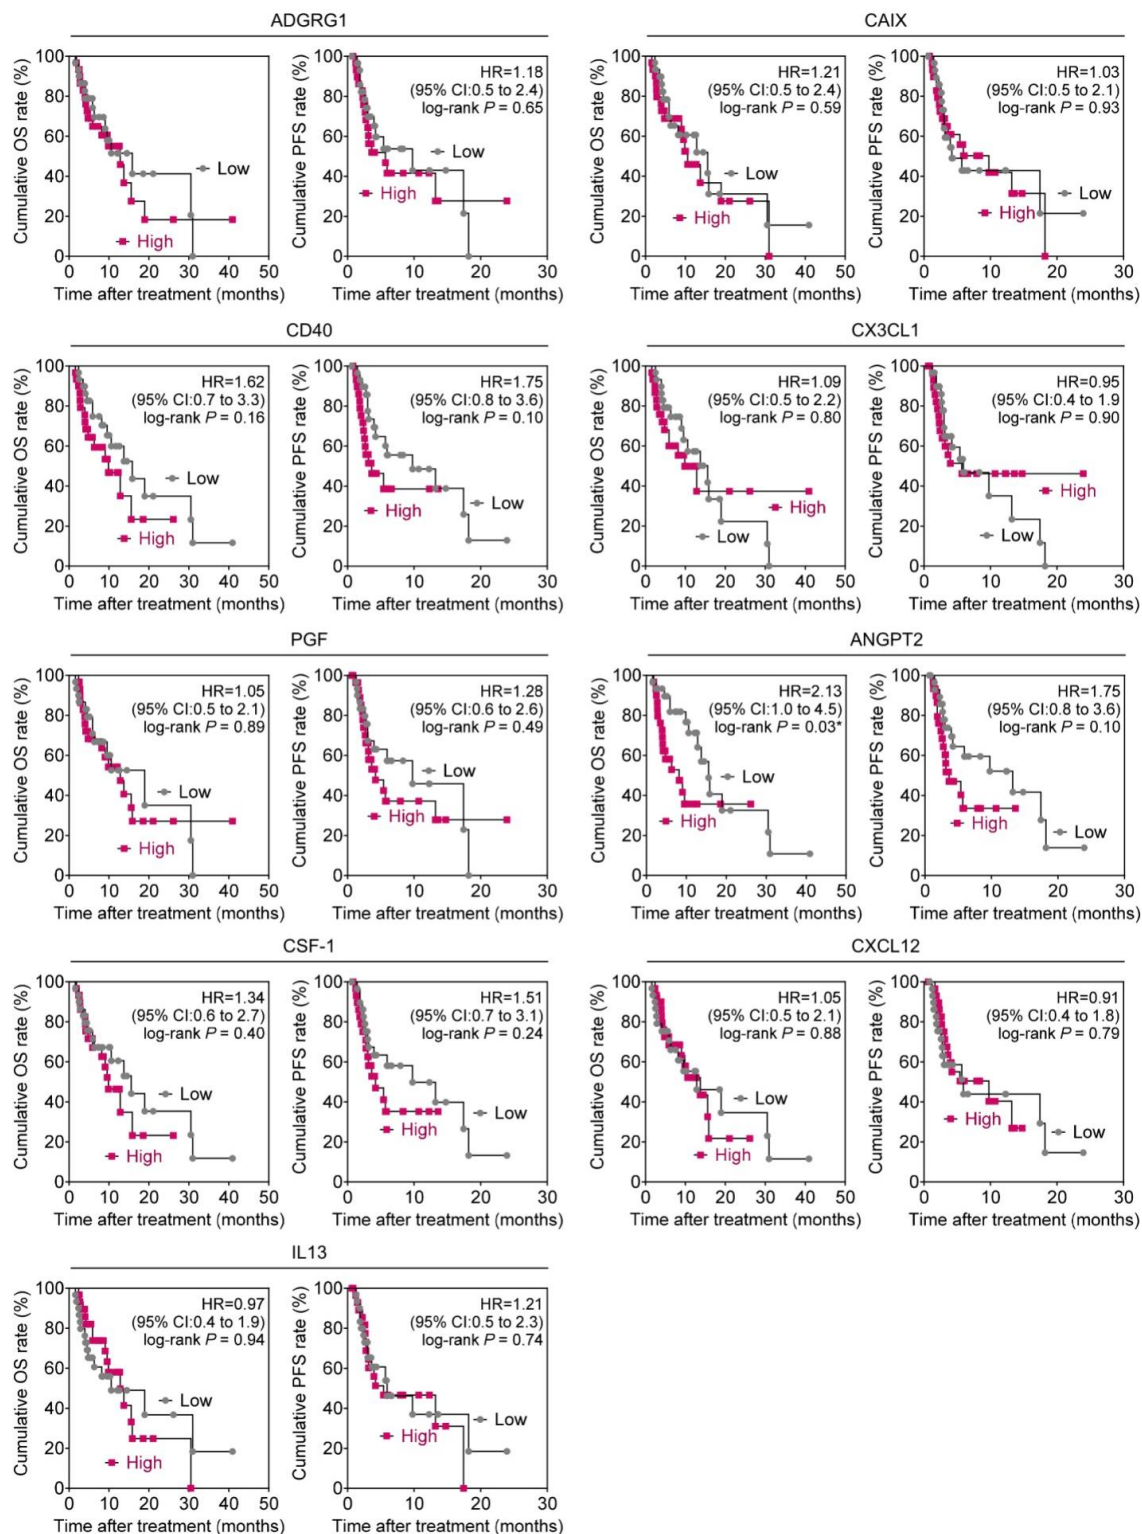

**Figure S1.** Kaplan-Meier survival analysis of nine protein markers in patients with HCC who were treated with TKIs on response.

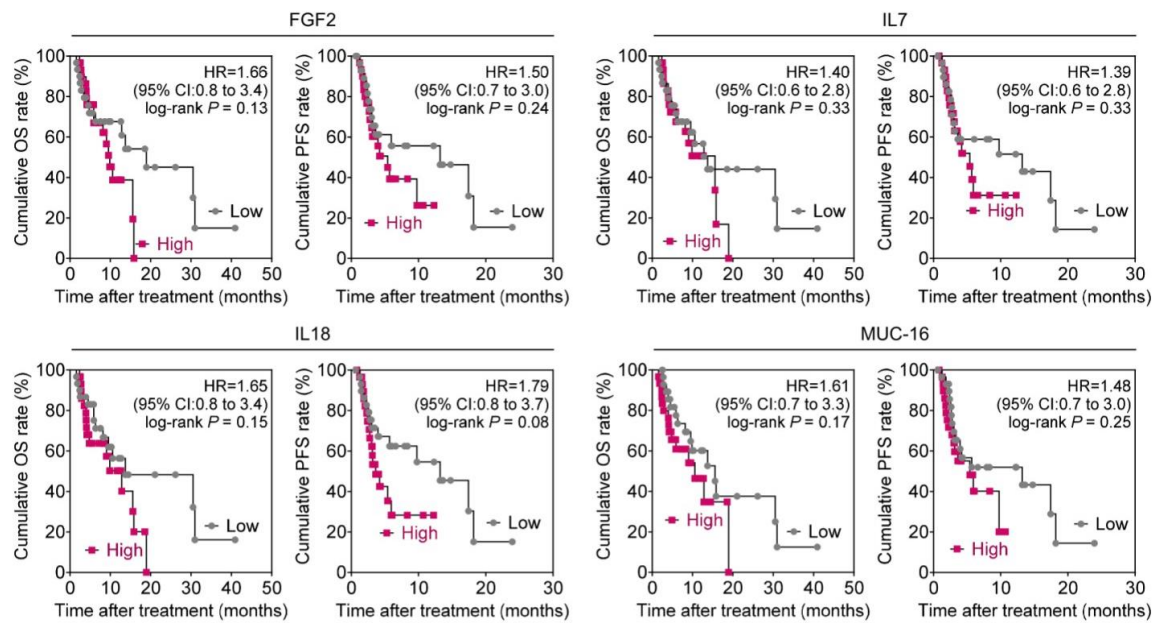

**Figure S2.** Kaplan-Meier survival analysis for prognostic protein markers in patients with HCC who were treated with TKIs based on the 12-month PFS criterion.
